# Supplementary material for: Predicting the murine enterocyte metabolic response to diets that differ in lipid and carbohydrate composition
Source: PubMed Central journal article supplement (PMC5562867; doi:10.1038/s41598-017-07350-1), 2017-08-18

## **Predicting the murine enterocyte metabolic response to diets that differ in lipid and carbohydrate composition**

Neeraj Sinha<sup>1,2,3</sup>, Maria Suarez-Diez<sup>2</sup>, Evert M. van Schothorst<sup>3</sup>, Jaap Keijer<sup>3</sup>, Vitor Martin dos Santos<sup>2,4</sup>, and Guido J. E.J. Hooiveld<sup>1</sup>

<sup>1</sup>Nutrition, Metabolism & Genomics Group, Division of Human Nutrition <sup>2</sup>Laboratory of Systems and Synthetic Biology, <sup>3</sup>Human and Animal Physiology, Wageningen University, Wageningen, The Netherlands, and <sup>4</sup>LifeGlimmer GmbH, Germany

### **Contents:**

#### **Supplementary Dataset 1: Separate Excel file containing:**

Sheet 1: Reaction information for 1830 reactions represented in model *mmu\_ENT717*.

Sheet 2: Metabolite information for 708 metabolites represented in model *mmu\_ENT717*.

Sheet 3: Dietary composition broken down into 39 components.

Sheet 4: Simulation results for selected metabolic task for enterocytes and flux through other reactions in the presence or absence of apical localized GLUT2.

Sheet 5: Simulation results of impact of reaction deletions on maximal glucose secretion.

Sheet 6: Simulation results of impact of reaction deletions on maximal TAG secretion in chylomicrons.

#### **Supplementary Dataset 2: Separate ZIP archive containing:**

Model *mmu\_ENT717* in *mat* format.

#### **Supplementary Figures:**

KEGG global metabolism map showing the reactions that upon deletion impaired glucose secretion (Figure S1), or abolished TAG secretion (Figure S2).



# Supplementary figure S2. KEGG global metabolism map showing the reactions that upon deletion abolished TAG secretion.

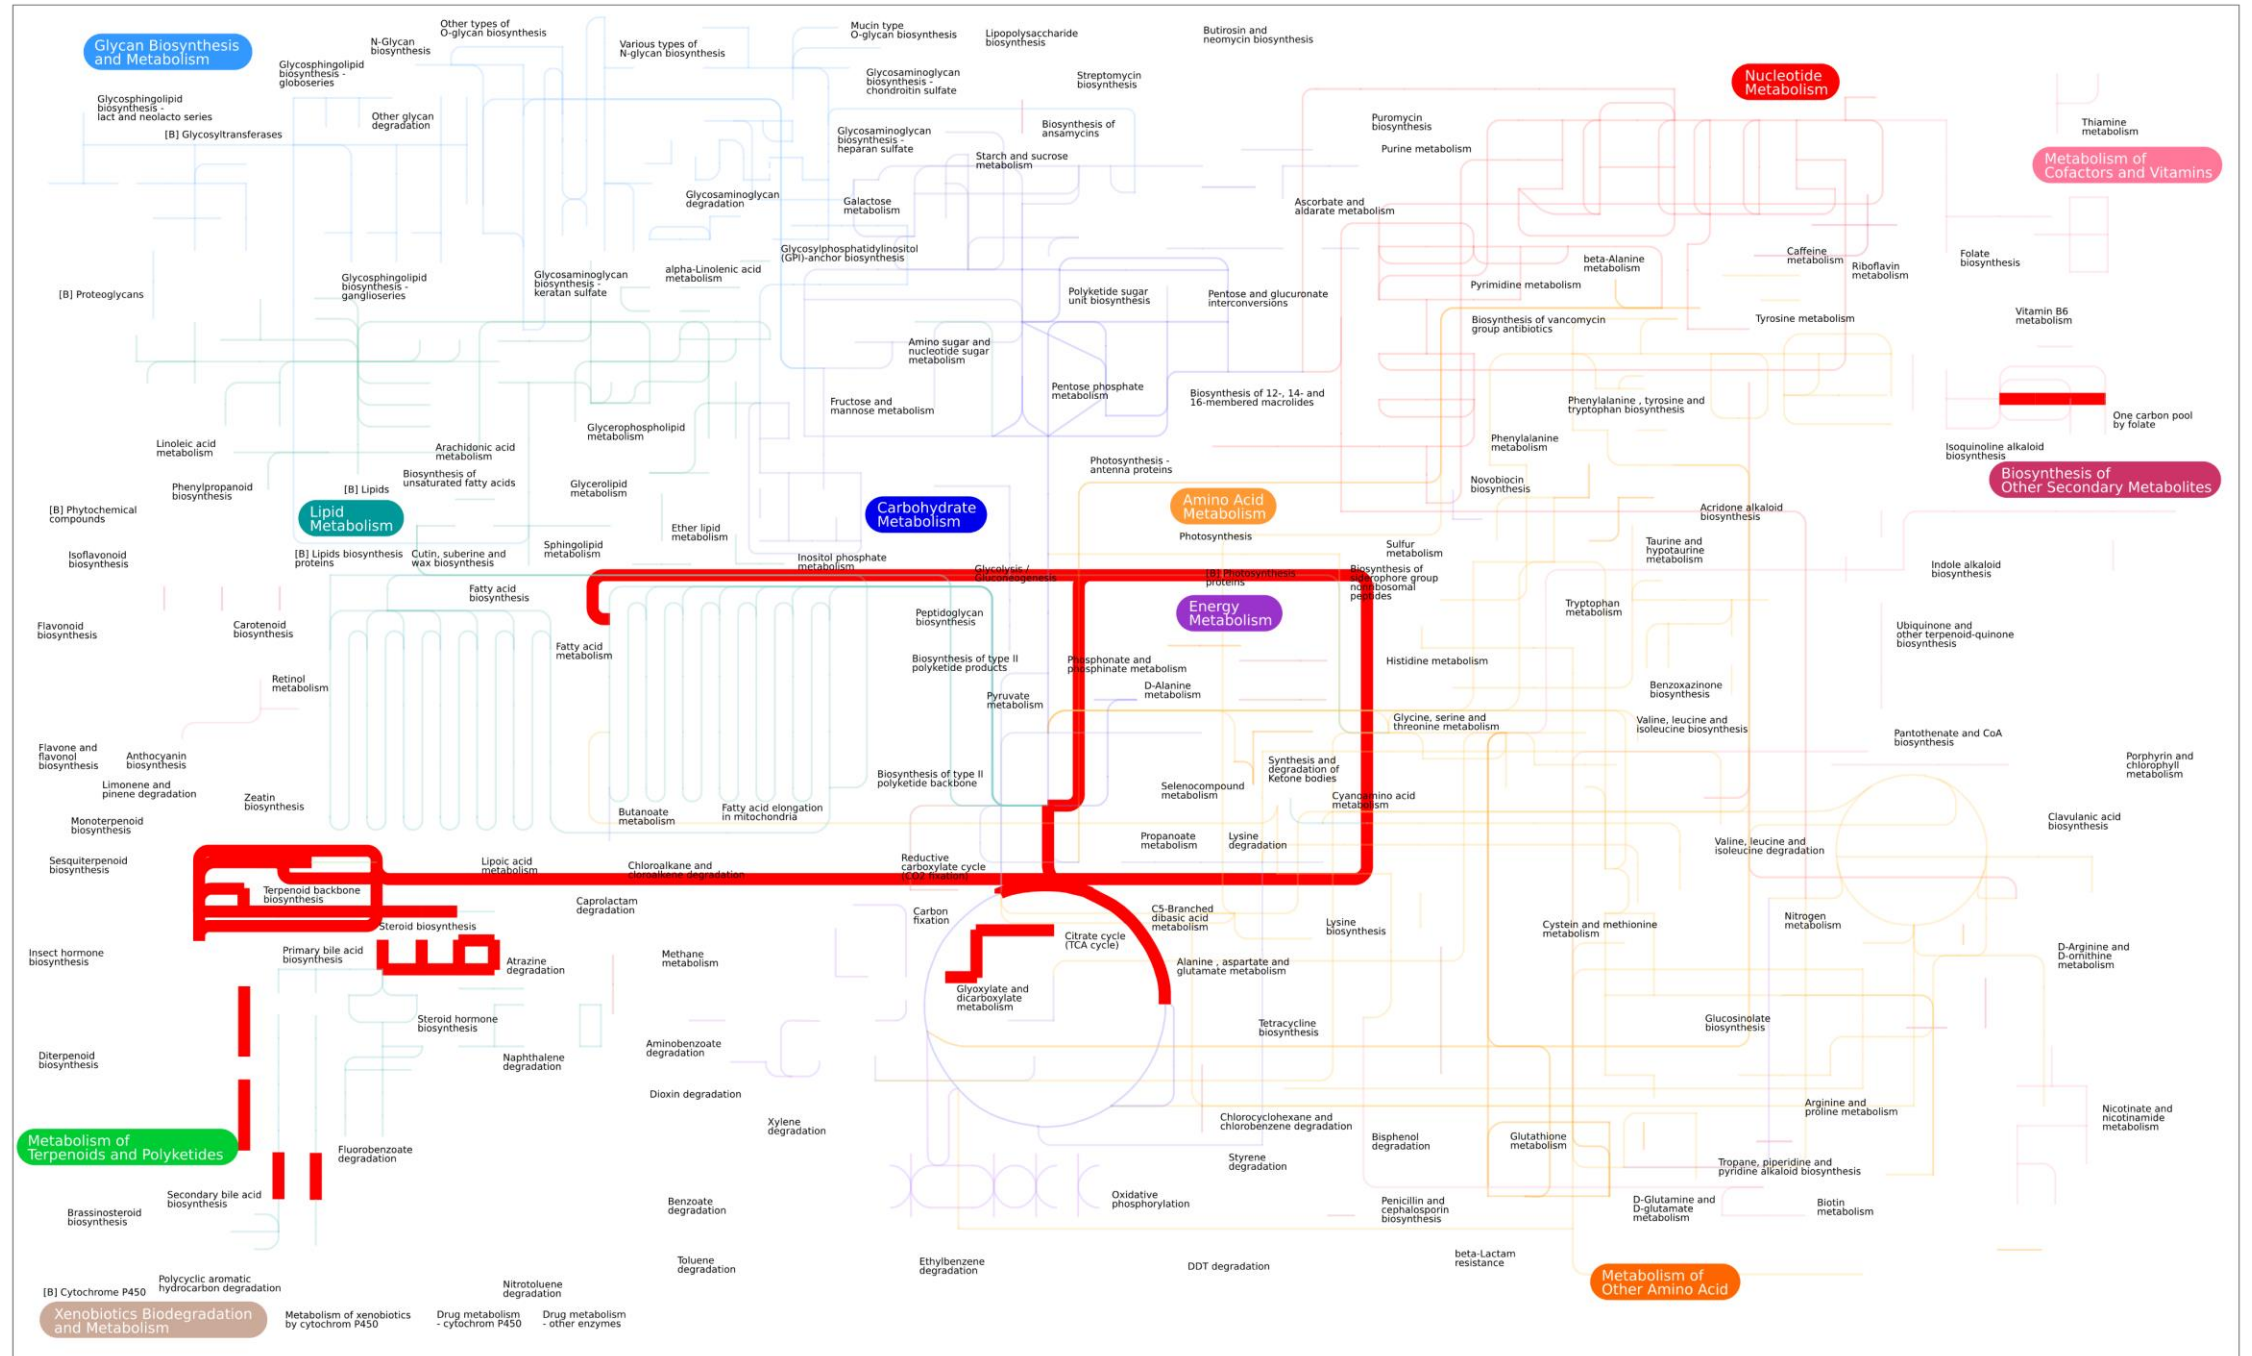

Supplement: 41598_2017_7350_MOESM1_ESM.pdf [file 41598_2017_7350_MOESM1_ESM.pdf]
